# Supplementary material
Source: PubMed Central journal article supplement (PMC5815326)
Supplement: NIHMS918278-supplement-1.pdf [file NIHMS918278-supplement-1.pdf]

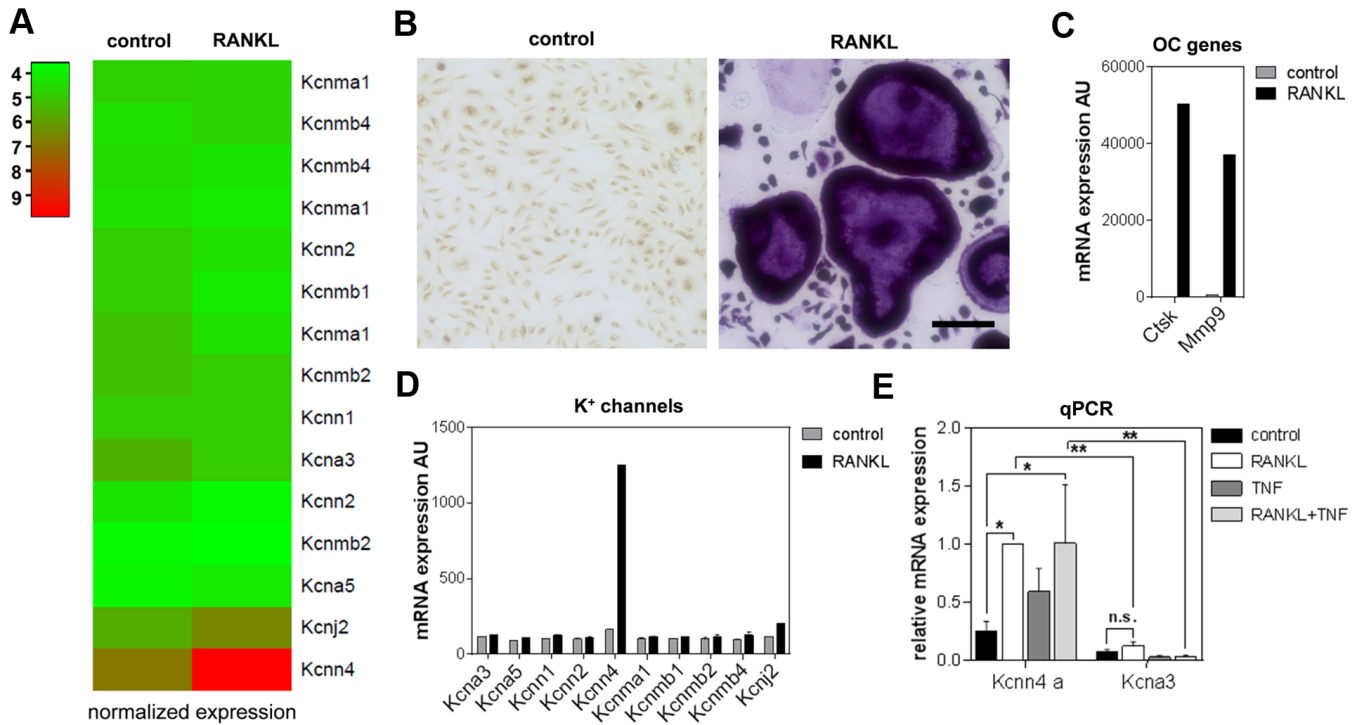

**Supplemental figure 1: *Kcnn4* is up-regulated during osteoclastogenesis.** A) Hierarchical cluster analysis of RNA microarray data obtained from mouse BMMs before (control) and after treatment with RANKL (RANKL) displaying the differential gene expression patterns of a selected panel of K<sup>+</sup> channels. B) Osteoclast formation was confirmed by cytochemical staining of TRAP (purple) in multinucleated giant cells (scale bar = 100 μM) and C) expression of osteoclast-specific genes (OC genes) *Ctsk* and *Mmp9* in arbitrary units (AU). D) Expression of K<sup>+</sup> channels obtained from microarray raw data in arbitrary units (AU). E) qPCR analysis comparing *KCa3.1* (*Kcnn4 a*) and *Kv1.3* (*Kcna3*) mRNA expression in BMMs cultivated in respective conditions for three days; one-way ANOVA followed by post-hoc multiple comparison test was performed ( $N=3$ );  $*=P<0.05$ ,  $**=P<0.01$ .

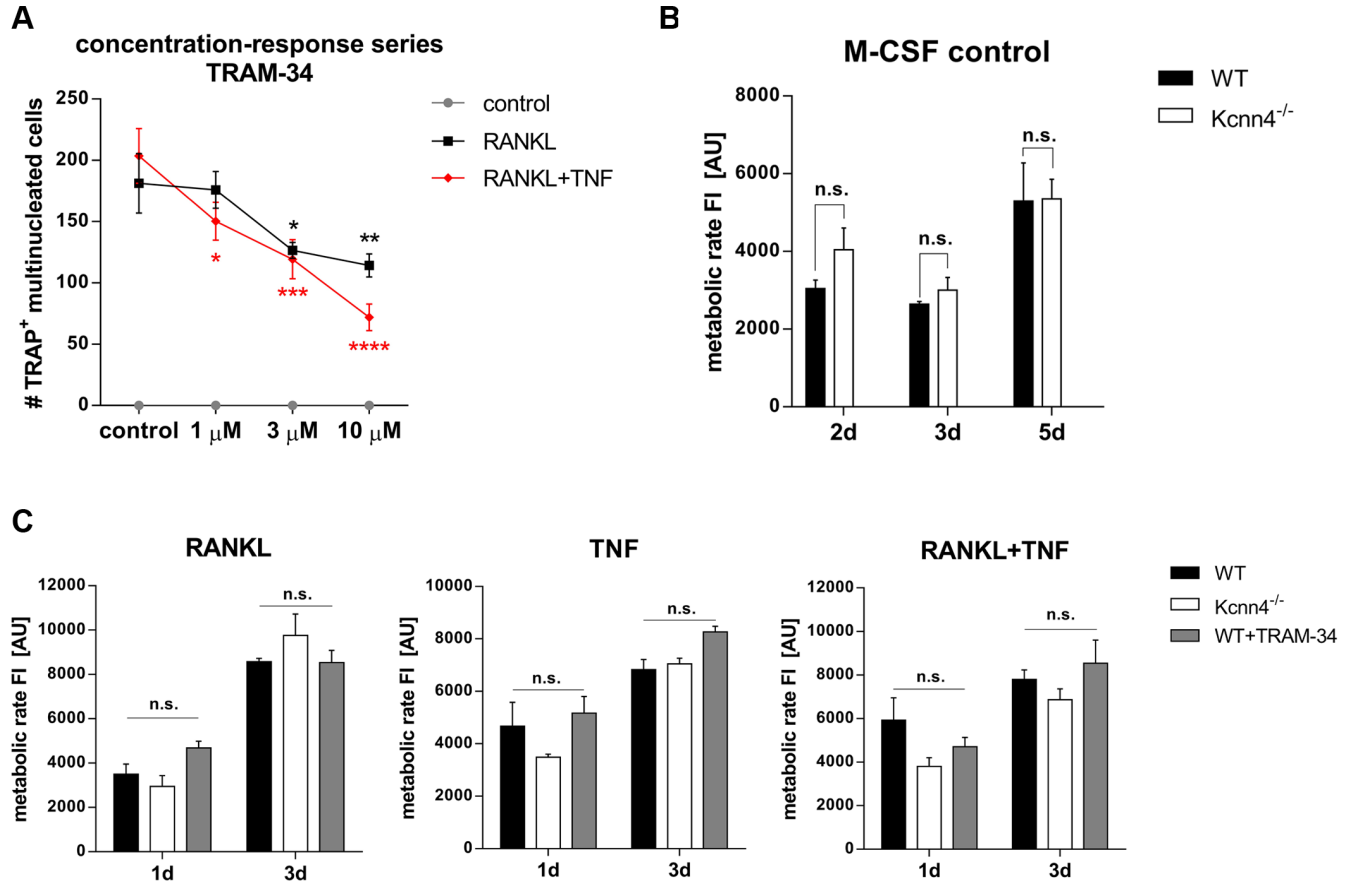

**Supplemental figure 2: Concentration-response, cytotoxicity and viability studies for TRAM-34 and *Kcnn4* knockout on macrophages and osteoclasts.** A) Concentration-response curves for BMMs treated with indicated amounts of TRAM-34 prior to stimulation with RANKL or RANKL+TNF for three days; graph indicates formation of multinucleated cells (>3 nuclei); B) Cell viability/proliferation assays obtained from Alamar blue staining of BMMs isolated from WT and *Kcnn4*<sup>-/-</sup> mice, two, three and five days in culture medium; C) Alamar blue assays of WT control-treated, *Kcnn4*<sup>-/-</sup>, and BMMs pretreated with 10  $\mu$ M TRAM-34 in the culture medium; shown are time points one day and three days after RANKL, TNF or RANKL+TNF stimulation ( $N=3$ ), two-way ANOVA ( $P<0.0001$  for both factors) with multiple comparison test was performed,  $*=P<0.05$ ,  $**=P<0.01$ ,  $***=P<0.001$ ,  $****=P<0.0001$ .

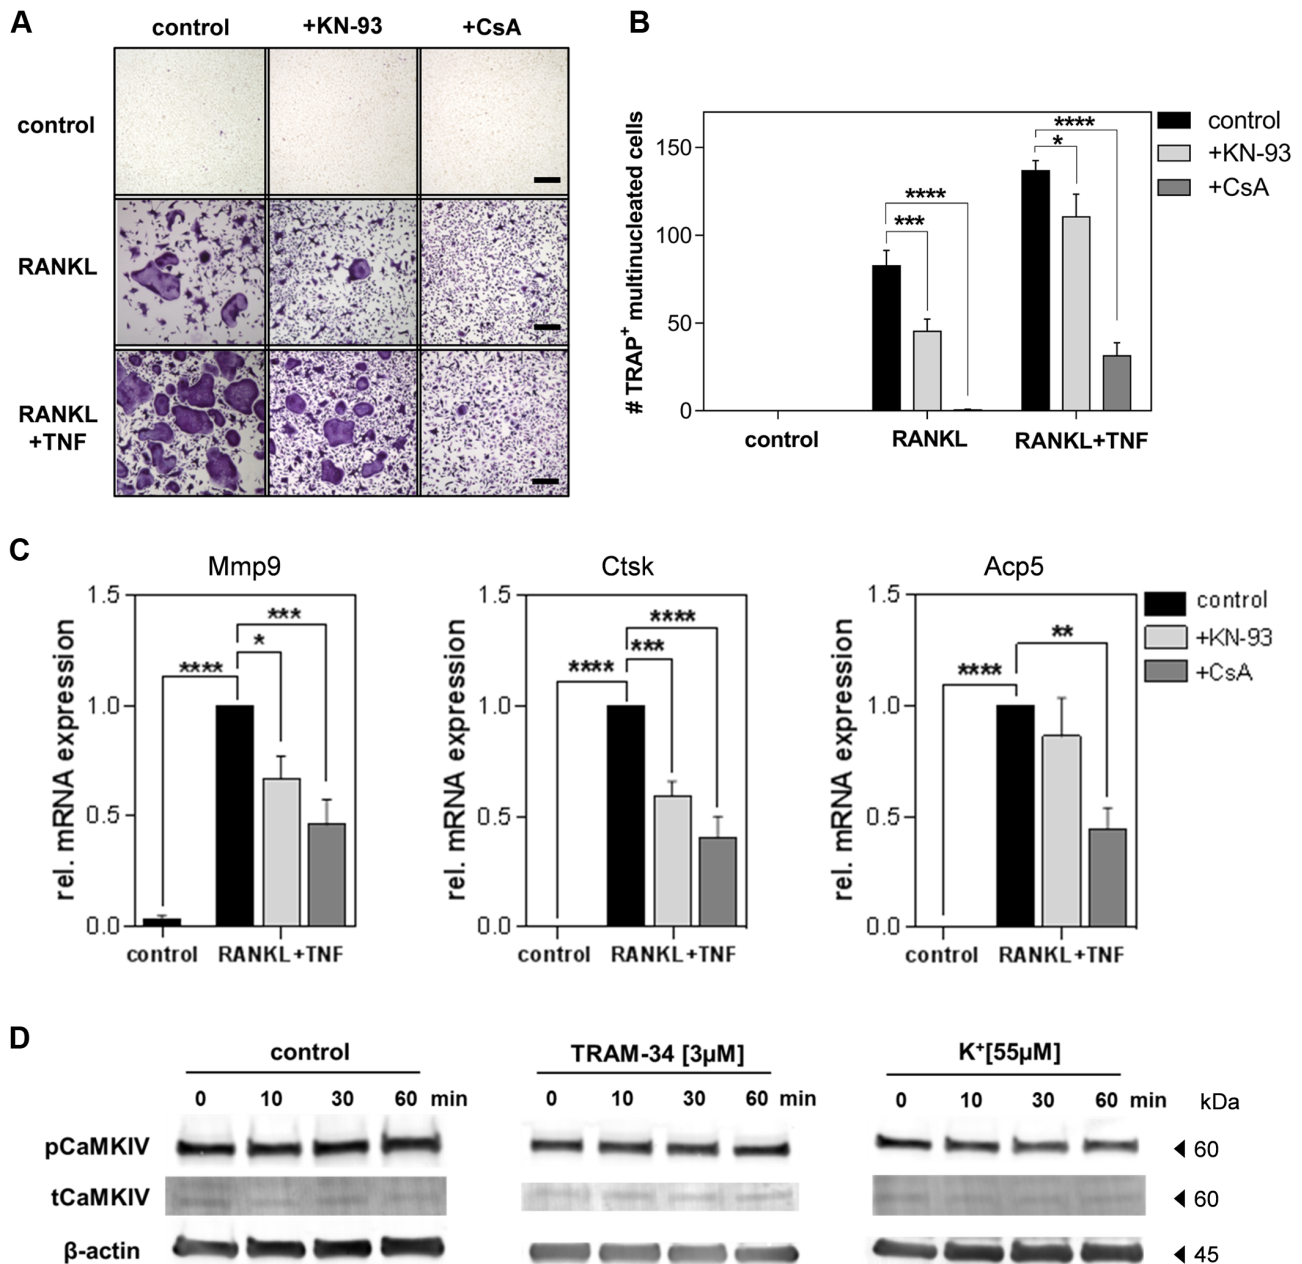

**Supplemental figure 3: Inhibition of CaMKIV or CaN drastically decreases osteoclast formation and transcription of osteoclast-specific genes in the presence of TNF.** A) Representative images of cytochemical TRAP staining of murine WT control BMMs (control), BMMs treated with 1  $\mu$ M KN-93 (+KN-93) (to inhibit CaMKIV), or 100 nM cyclosporine A (+CsA) (to inhibit CaN) cultured in indicated conditions ( $N=3$ , scale bar = 100  $\mu$ M). B) Numbers of multinucleated TRAP<sup>+</sup> cells (purple) (>3 nuclei) obtained from A) ( $N=3$ ); C) qPCR analysis showing normalized mRNA expression of osteoclast-specific genes ( $N=4$ ); shown are

means  $\pm$  SEM, one-way ANOVA followed by multiple comparison test was performed,  $*=P<0.05$ ,  $**=P<0.01$ ,  $***=P<0.001$ ,  $****=P<0.0001$ . D) Western blot studies of BMMs stimulated with 100 ng/mL RANKL for indicated times showing phosphorylated (pCaMKIV) and total CaMKIV (tCaMKIV) versus  $\beta$ -actin; left: control stimulated, middle: pre-treated with 3  $\mu$ M TRAM-34, right: in culture medium with increased  $K^+$  concentration; blots are representative for two independent experiments.
